# Supplementary material for: Berberine binds RXRα to suppress β-catenin signaling in colon cancer cells
Source: PubMed Central journal article supplement — Oncogene. 2017 Aug 28;36(50):6906–18. doi: 10.1038/onc.2017.296 (PMC5735301; doi:10.1038/onc.2017.296), 2017-08-28

# Supplementary Figure S1

**a**

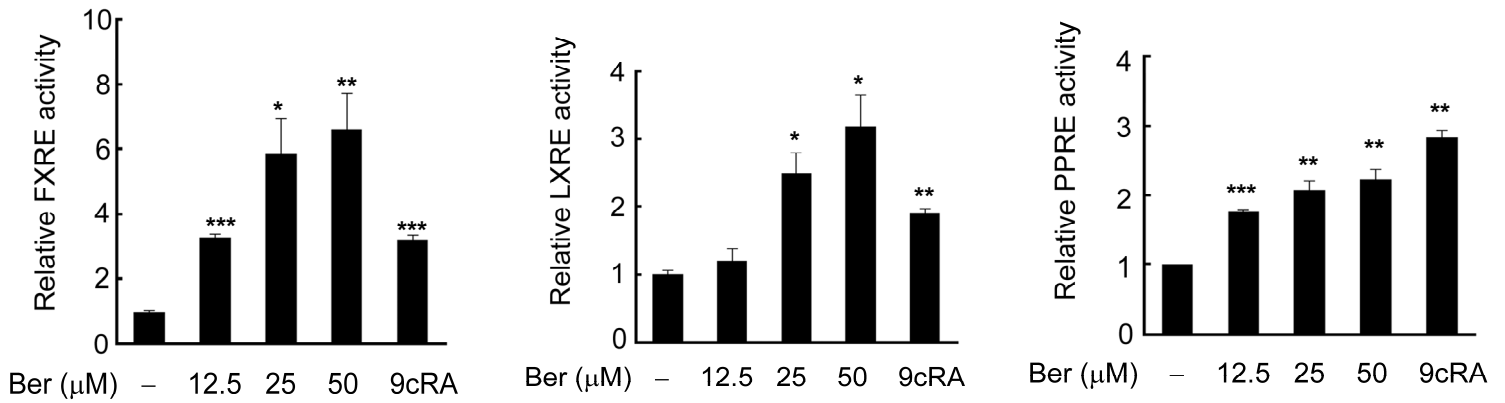

**b**

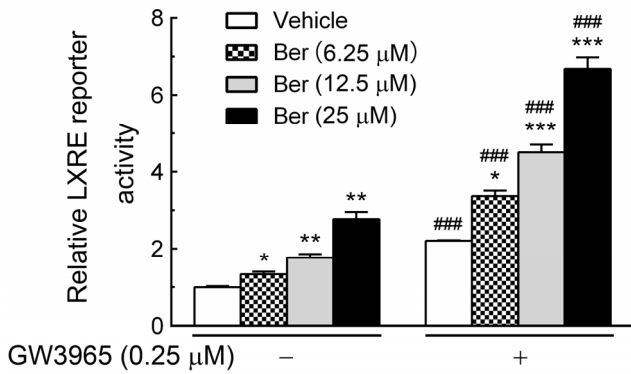

**c**

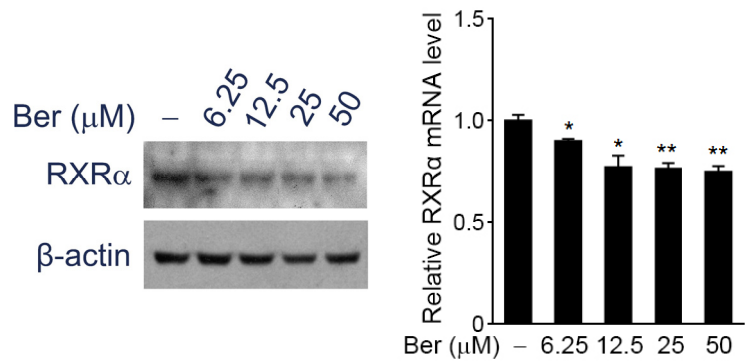

**d**

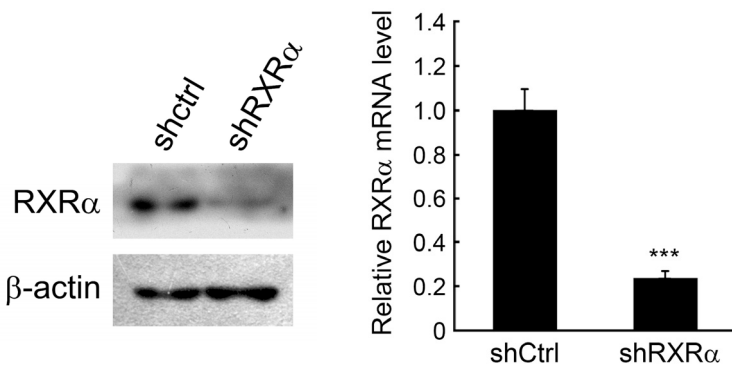

**f**

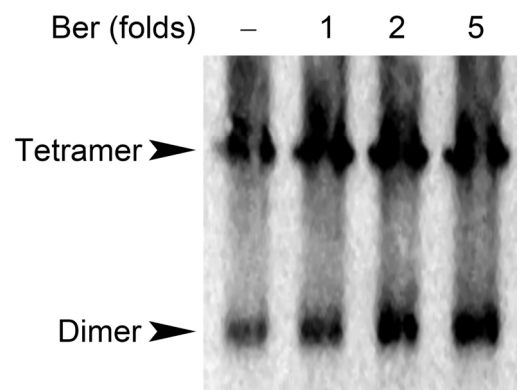

**e**

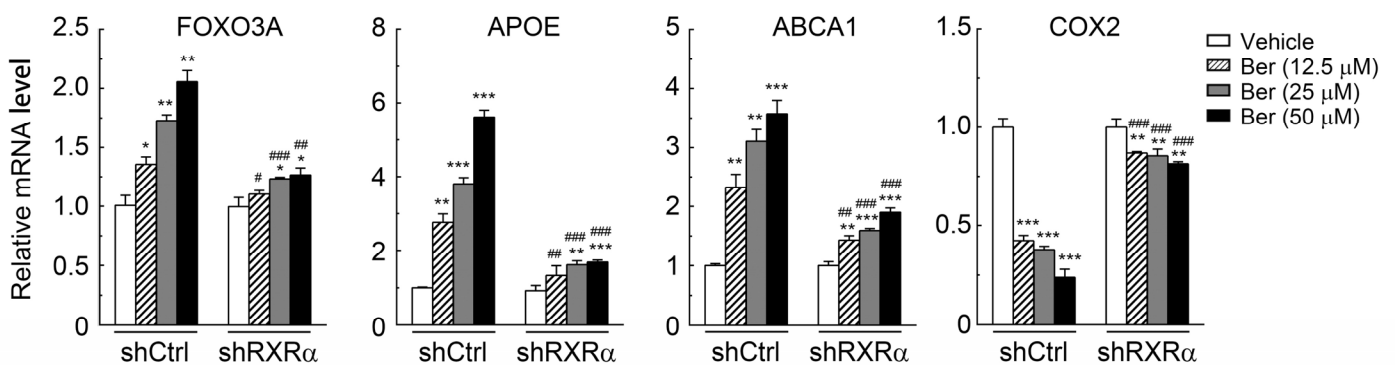

# Supplementary Figure S2

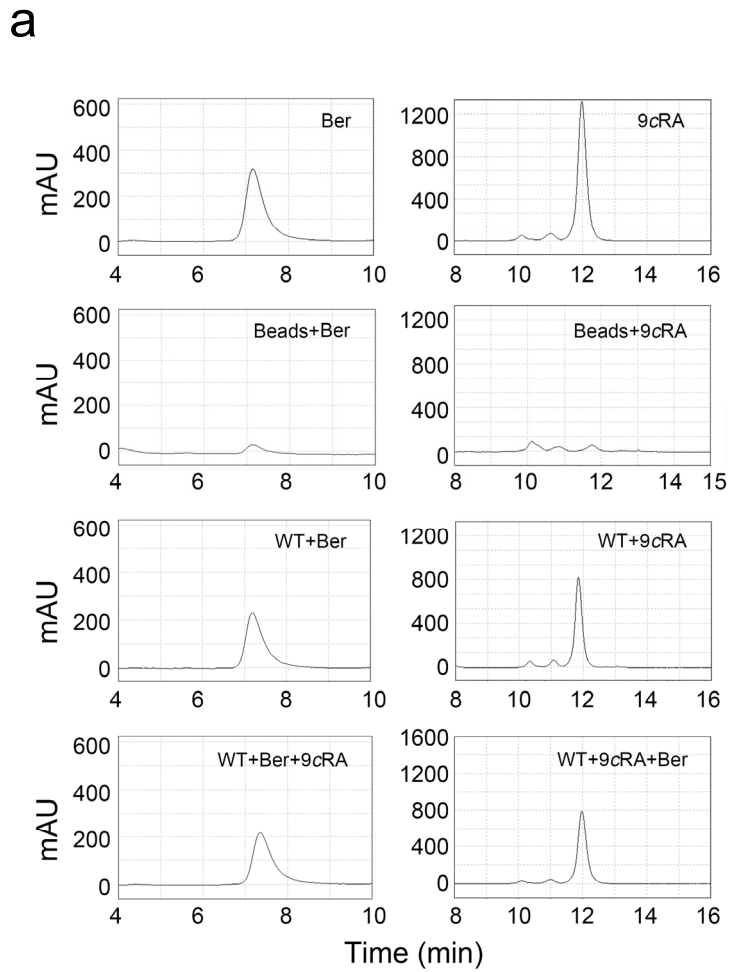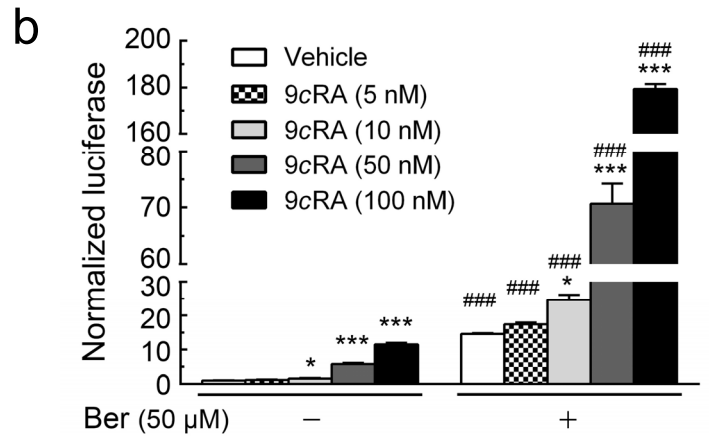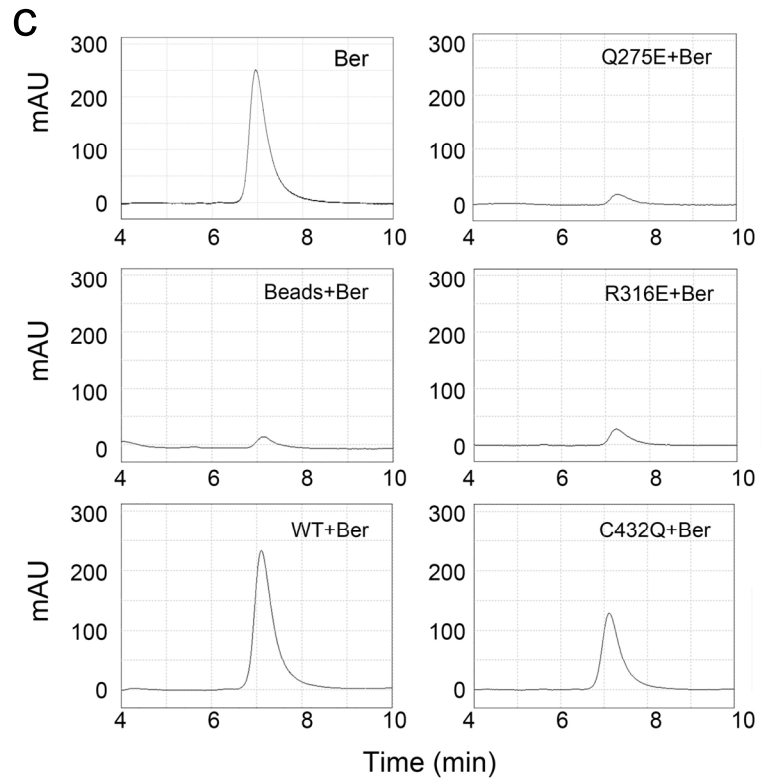

# Supplementary Figure S3

a

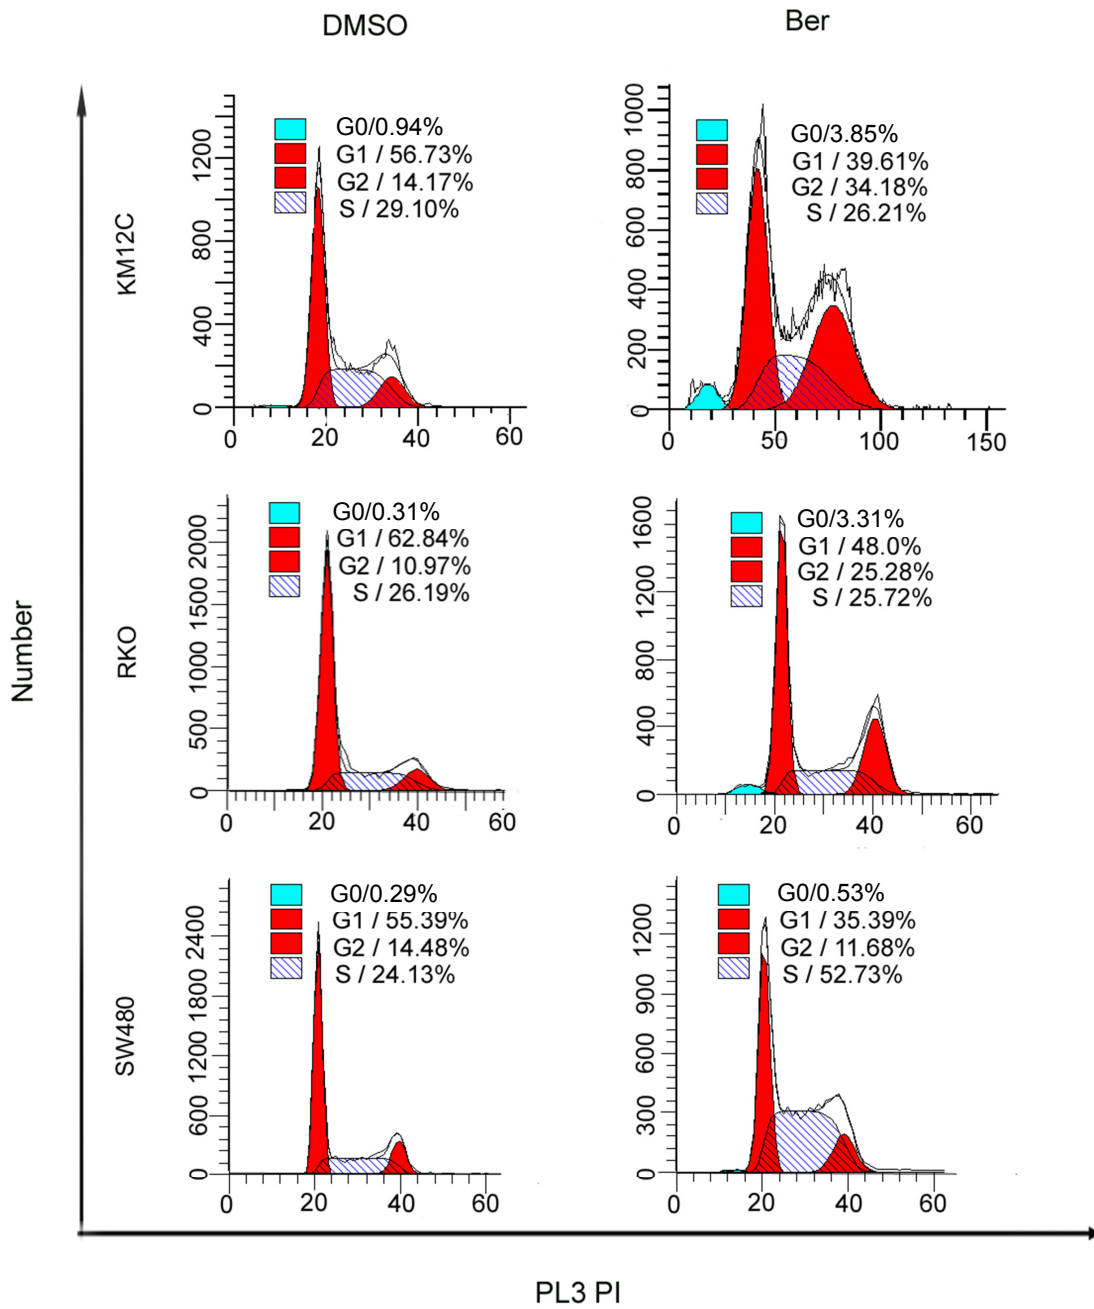

b

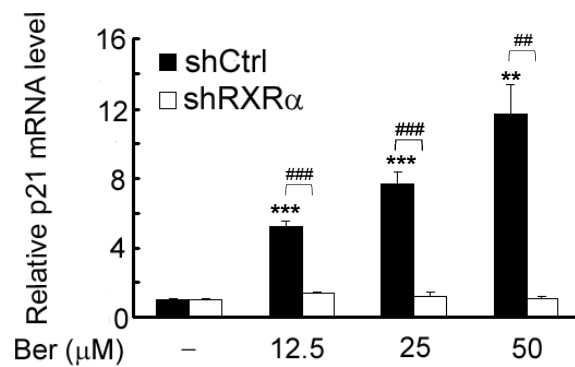

# Supplementary Figure S4

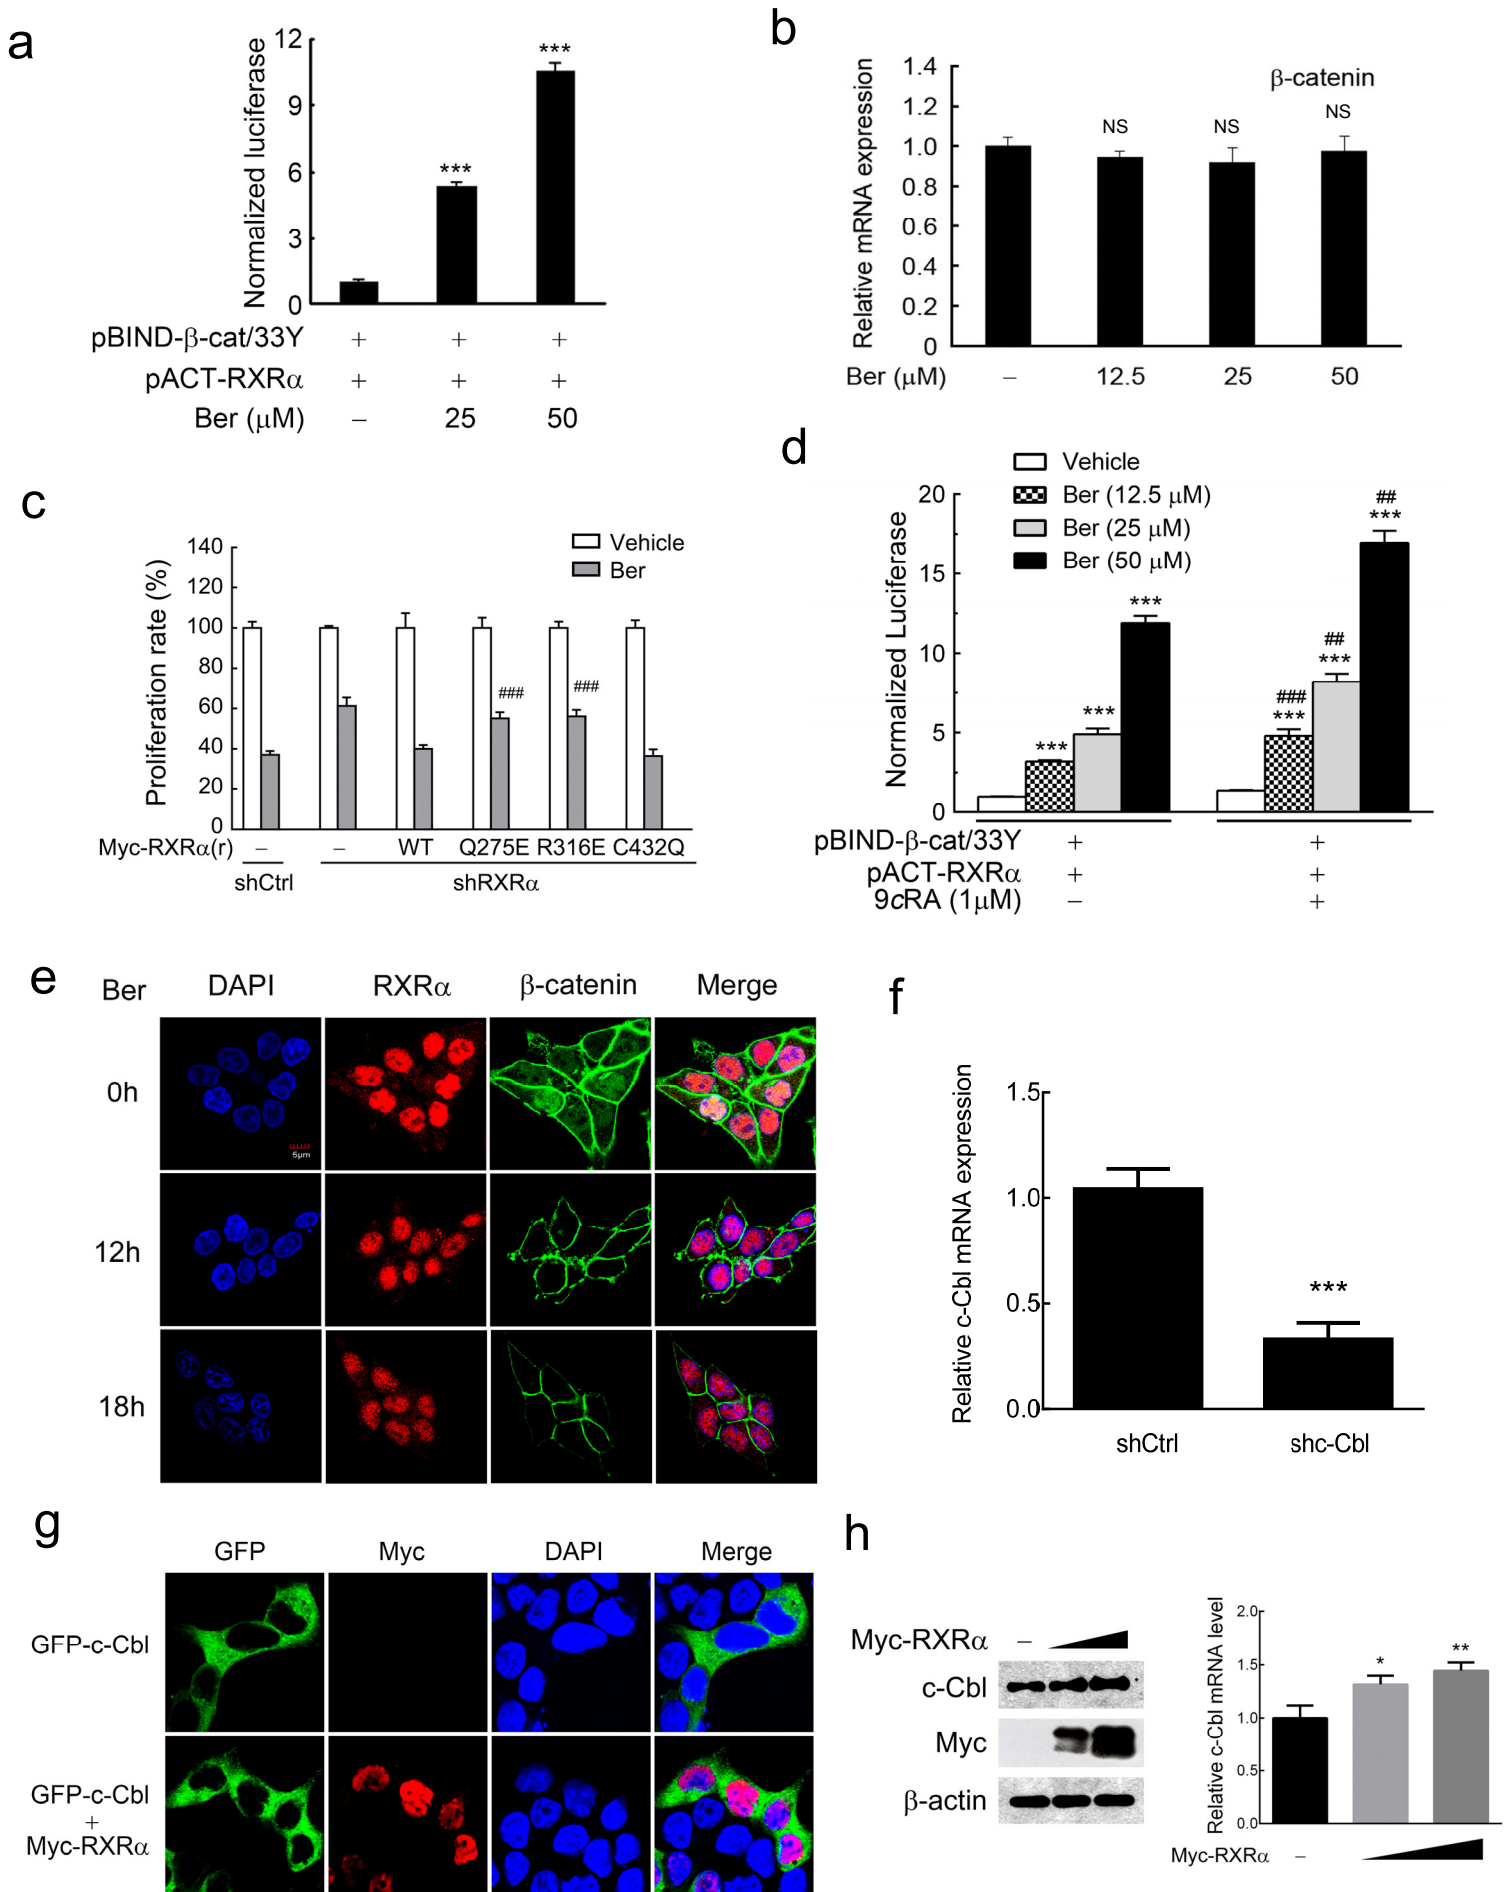

# Supplementary Figure S5

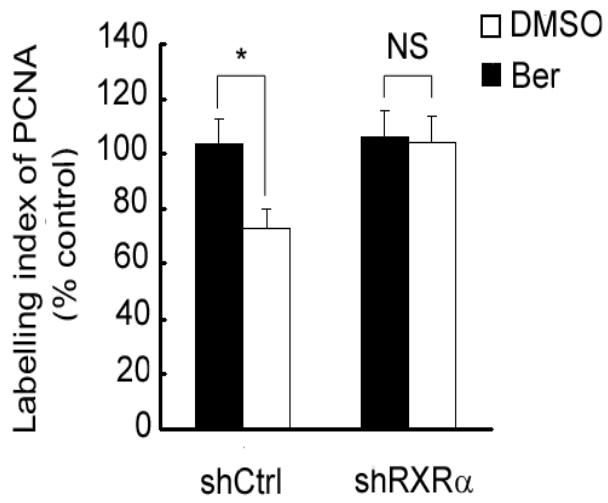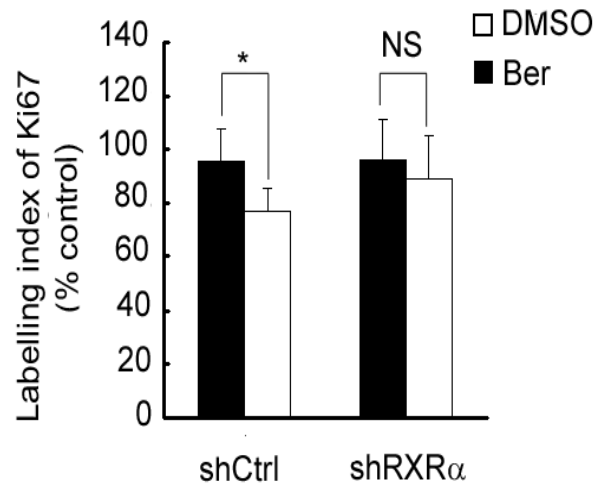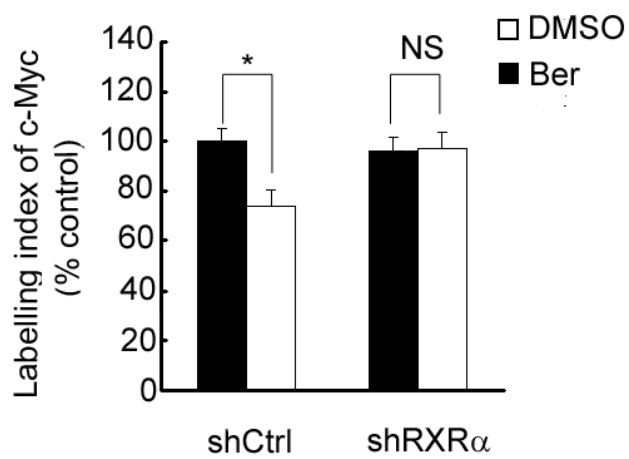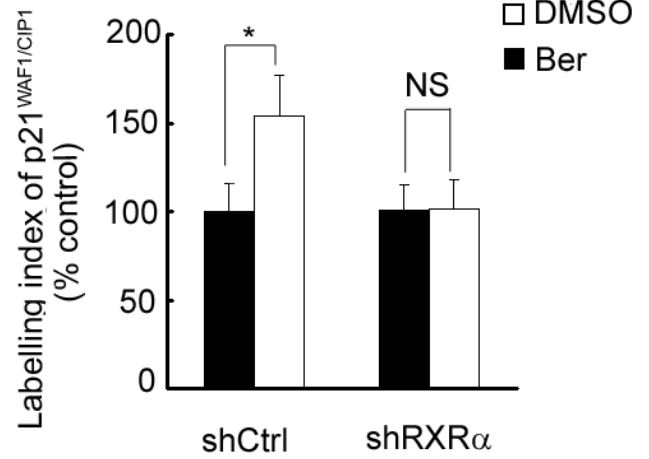

Supplement: onc2017296x1.pdf [file onc2017296x1.pdf]
